# Supplementary material
Source: publisher figshare collection journal article supplement (https://tandf.figshare.com/articles/dataset/_/8428877)
Supplement: Supplementary file 1 [file 1]

**Supplementary Table S3. Linkage disequilibrium among 3 SNPs.**

| SNPID     | rs7243626 | rs9966620 | rs7240470 |
|-----------|-----------|-----------|-----------|
| rs7243626 | 1         | 1         | 0.84      |
| rs9966620 | 1         | 1         | 0.85      |
| rs7240470 | 0.84      | 0.85      | 1         |

SNP: single nucleotide polymorphism

The values in the table indicate R-square values.
