# Supplementary material
Source: publisher figshare collection journal article supplement (https://tandf.figshare.com/articles/dataset/_/8428877)
Supplement: Supplementary file 2 [file 1]

Archive with 6 entries (6 files):
- iopg_a_1633549_sm7618.pdf
- iopg_a_1633549_sm7615.pdf
- iopg_a_1633549_sm7611.pdf
- iopg_a_1633549_sm7609.pdf
- iopg_a_1633549_sm7053.tif
- iopg_a_1633549_sm7024.tif
