# Supplementary material
Source: publisher figshare collection journal article supplement (https://tandf.figshare.com/articles/dataset/_/8428877)
Supplement: Supplementary file 2 [file 1 › iopg_a_1633549_sm7609.pdf]

**Supplementary Table S4. The top SNPs for the GWAS on the phenotypes of DM (regardless of visual acuity, 1,240 cases) against the controls (1,374 samples).**

| Chromosome | SNP         | Positions | Test | NMISS | OR     | SE      | L95    | U95    | <i>P</i>              |
|------------|-------------|-----------|------|-------|--------|---------|--------|--------|-----------------------|
| 1          | rs3818329   | 192627760 | ADD  | 2324  | 1.865  | 0.1202  | 1.474  | 2.361  | 2.12x10 <sup>-7</sup> |
| 3          | rs12629668  | 147209179 | ADD  | 2061  | 1.397  | 0.06611 | 1.228  | 1.591  | 4.15x10 <sup>-7</sup> |
| 6          | rs117482282 | 165511471 | ADD  | 2361  | 3.079  | 0.2224  | 1.991  | 4.762  | 4.27x10 <sup>-7</sup> |
| 13         | rs1149833   | 50750876  | ADD  | 2557  | 0.747  | 0.05813 | 0.6666 | 0.8372 | 5.23x10 <sup>-7</sup> |
| 2          | rs1406230   | 29583321  | ADD  | 1943  | 0.6923 | 0.07334 | 0.5996 | 0.7994 | 5.35x10 <sup>-7</sup> |
| 1          | rs2296022   | 192627124 | ADD  | 2324  | 1.799  | 0.1183  | 1.427  | 2.269  | 6.92x10 <sup>-7</sup> |
| 16         | rs35498131  | 9120809   | ADD  | 1493  | 0.5596 | 0.117   | 0.445  | 0.7038 | 6.94x10 <sup>-7</sup> |
| 7          | rs140306040 | 62321151  | ADD  | 2171  | 0.509  | 0.1365  | 0.3895 | 0.6651 | 7.47x10 <sup>-7</sup> |
| 7          | rs73121760  | 62313911  | ADD  | 2155  | 0.5131 | 0.135   | 0.3938 | 0.6685 | 7.71x10 <sup>-7</sup> |
| 16         | rs34300094  | 9120719   | ADD  | 1487  | 0.5589 | 0.1184  | 0.4431 | 0.7049 | 8.98x10 <sup>-7</sup> |
| 2          | rs34954281  | 152225877 | ADD  | 2021  | 0.6739 | 0.08045 | 0.5756 | 0.789  | 9.34x10 <sup>-7</sup> |

SNP: single nucleotide polymorphism

NMISS: number of individuals for the logistic regression analysis of a specific SNP

OR: odds ratio

SE: standard error

ADD: additive model
