# Supplementary material
Source: publisher figshare collection journal article supplement (https://tandf.figshare.com/articles/dataset/_/8428877)
Supplement: Supplementary file 2 [file 1 › iopg_a_1633549_sm7615.pdf]

**Supplementary Table S2. Maculopathy and retinopathy grades for the diabetic retinal screen.**

| MACULOPATHY GRADING                                                                                                                                         |                                                                                                                                                                                                                                                                 |                                                                                                                                 |
|-------------------------------------------------------------------------------------------------------------------------------------------------------------|-----------------------------------------------------------------------------------------------------------------------------------------------------------------------------------------------------------------------------------------------------------------|---------------------------------------------------------------------------------------------------------------------------------|
| Maculopathy                                                                                                                                                 | Description                                                                                                                                                                                                                                                     | Outcome                                                                                                                         |
| <b>M0</b><br>(No maculopathy)                                                                                                                               | No features $\leq 2$ disc diameters from the centre of the fovea, enough to classify it as M1 or M2 from definitions below                                                                                                                                      | Rescreen in 12 months                                                                                                           |
| <b>M1</b> (Observable)                                                                                                                                      | Any hard exudates within a radius of $> 1$ but $\leq 2$ disc diameters of the fovea centre                                                                                                                                                                      | Rescreen in 6 months or refer to ophthalmology if not feasible                                                                  |
| <b>M2</b> (Referable)                                                                                                                                       | Any hard exudates or blot haemorrhages within a distance of $\leq 1$ disc diameter of the fovea centre.                                                                                                                                                         | Refer to ophthalmology (these patients will not definitely receive immediate laser treatment and may be kept under surveillance |
| RETINOPATHY GRADING                                                                                                                                         |                                                                                                                                                                                                                                                                 |                                                                                                                                 |
| Retinopathy                                                                                                                                                 | Description                                                                                                                                                                                                                                                     | Outcome                                                                                                                         |
| <b>R0</b> (No visible retinopathy)                                                                                                                          | No diabetic retinopathy anywhere                                                                                                                                                                                                                                | Rescreen in 12 month                                                                                                            |
| <b>R1</b> (Mild)                                                                                                                                            | Background Diabetic Retinopathy (BDR) – Mild<br>Presence of any one of these:<br>Dot haemorrhages, micro-aneurysms, hard exudates, cotton-wool spots, blot haemorrhages, flames shaped haemorrhages                                                             | Rescreen in 12 month                                                                                                            |
| <b>R2</b> (Observable Background)                                                                                                                           | Background Diabetic Retinopathy (BDR) – Observable<br>Four(4) or more blot haemorrhages in one hemi-field*                                                                                                                                                      | Rescreen in 6 month                                                                                                             |
| <b>R3</b> (Referable Background)                                                                                                                            | Background Diabetic Retinopathy (BDR) - Referable<br>Presence of any of the following: <ul style="list-style-type: none"> <li>• Four(4) or more blot haemorrhages in both superior and inferior hemifields</li> <li>• Venous beading</li> <li>• IrMA</li> </ul> | Refer to ophthalmology;                                                                                                         |
| <b>R4</b> (Proliferative)                                                                                                                                   | Proliferative Diabetic Retinopathy (PDR)<br>Presence of active new vessels or Vitreous haemorrhage                                                                                                                                                              | Refer to ophthalmology; Patients are likely to receive laser treatment or other intervention                                    |
| <b>R6</b> (Inadequate)                                                                                                                                      | Not adequately visualized; Retina not sufficiently visible for assessment                                                                                                                                                                                       | Technical failure; Patients for alternative screening examination.                                                              |
| IrMA, Intraretinal Microvascular Abnormality.<br>* The hemifields, Superior and Inferior, are demarcated by a line through the fovea centre and optic disc. |                                                                                                                                                                                                                                                                 |                                                                                                                                 |

**Source:** The Scottish Diabetic Retinopathy Grading Scheme 2007 v1.0.<sup>16</sup>
