# Supplementary material
Source: publisher figshare collection journal article supplement (https://tandf.figshare.com/articles/dataset/_/8428877)
Supplement: Supplementary file 2 [file 1 › iopg_a_1633549_sm7618.pdf]

**Supplementary Table S1.** The definition of visual acuity in GoDARTS.

| Visual acuity coding | Description            |
|----------------------|------------------------|
| 1                    | 6/4                    |
| 2                    | 6/5                    |
| 3                    | 6/6                    |
| 4                    | 6/9                    |
| 5                    | 6/12                   |
| 6                    | 6/18                   |
| 7                    | 6/24                   |
| 8                    | 6/36                   |
| 9                    | 6/60                   |
| 10                   | 3/60                   |
| 11                   | Counting fingers       |
| 12                   | Hand movements         |
| 13                   | Perception of Light    |
| 14                   | No perception of Light |

Visual acuity of 6/12 means a testing eye can see at six metres while an eye with normal vision can see at 12 metres away.

Individuals with coding 11 to 14 were removed from study.
