# Supplementary material
Source: publisher figshare collection journal article supplement (https://tandf.figshare.com/articles/dataset/_/8428877)

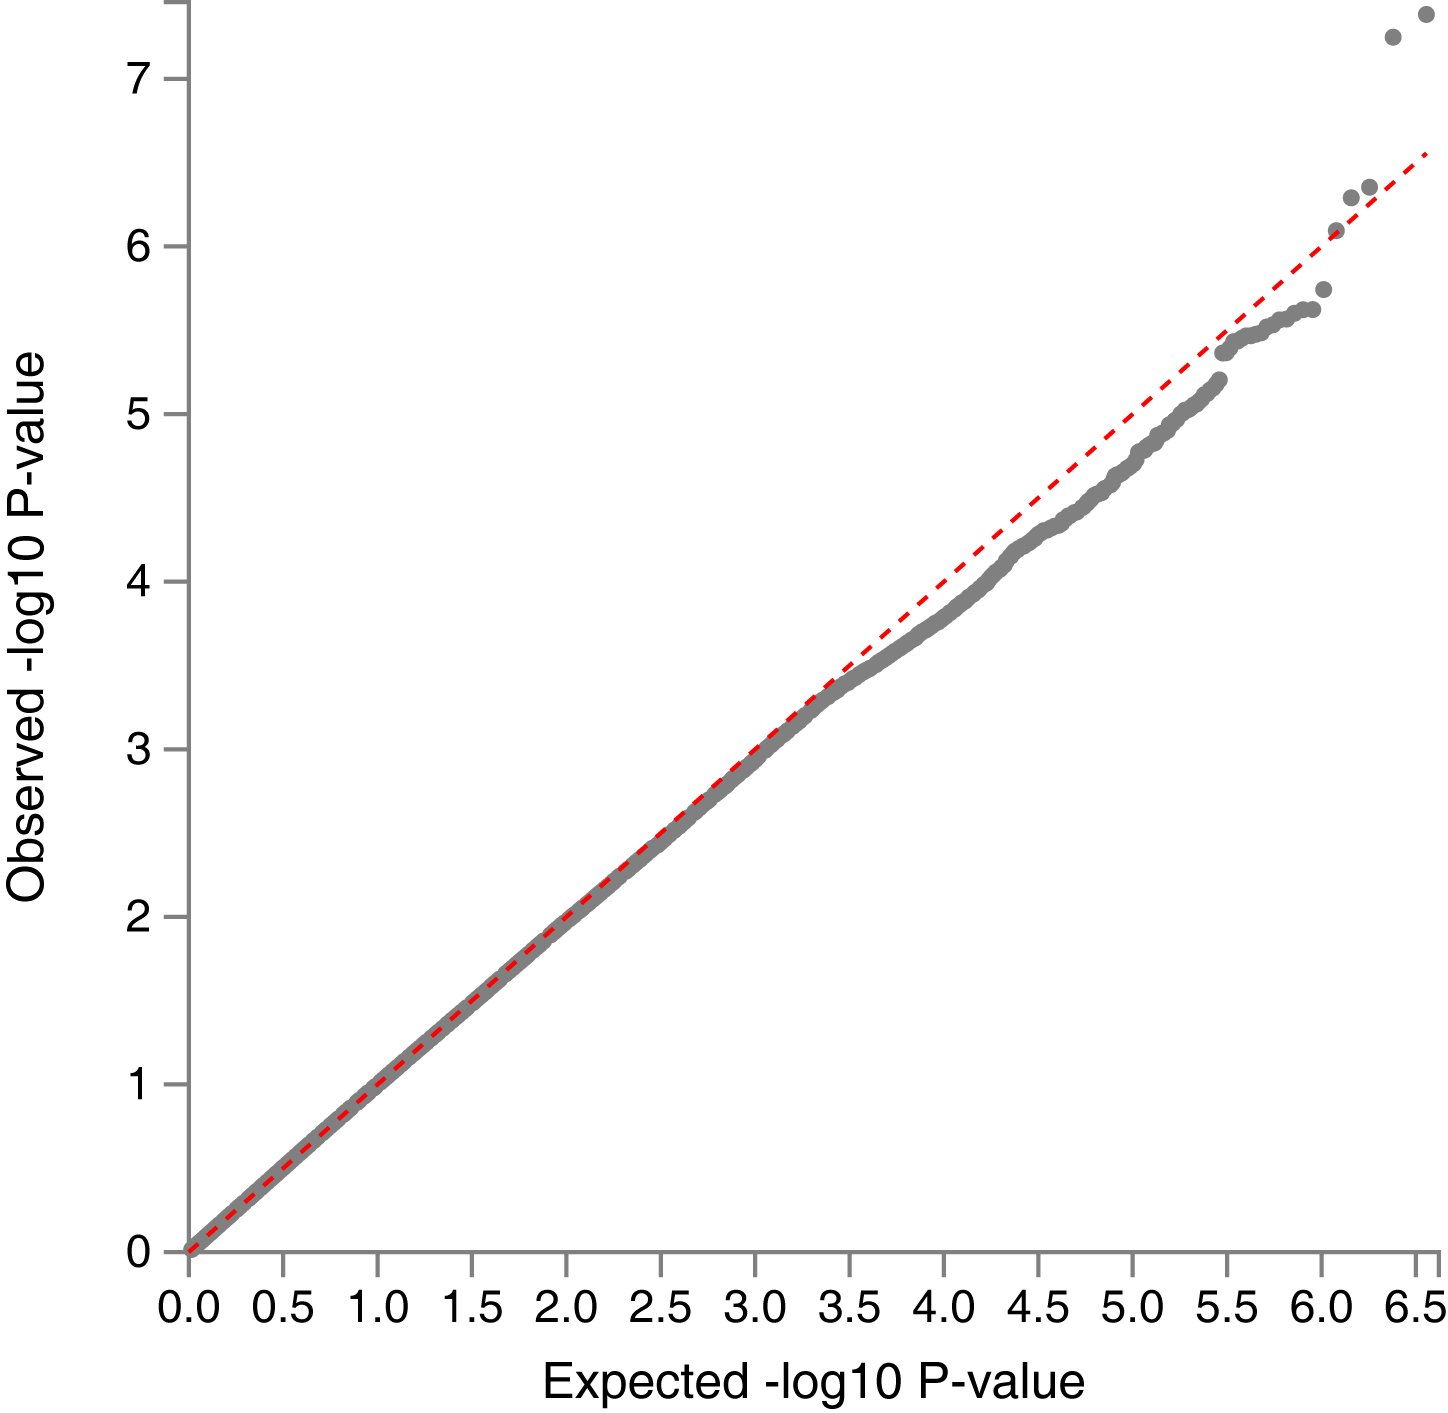

Supplement: Supplementary file 2 [file 1 › iopg_a_1633549_sm7024.tif]
